# Supplementary material
Source: MDPI journal article supplement (https://www.mdpi.com/1424-2818/14/5/354)
Supplement: s1 [file s1 › diversity-1659544-supplementary.pdf]

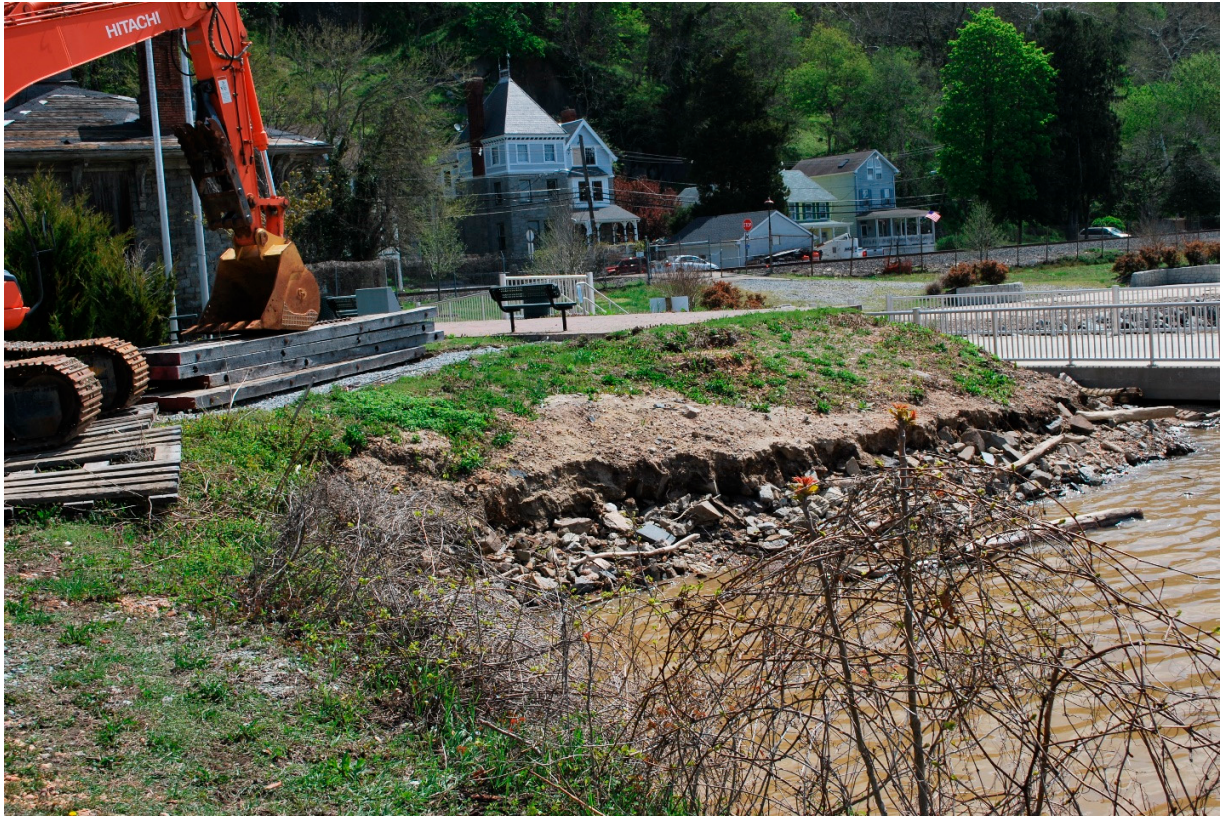

Figure S1. Map Turtle nesting beach prior to reconstruction

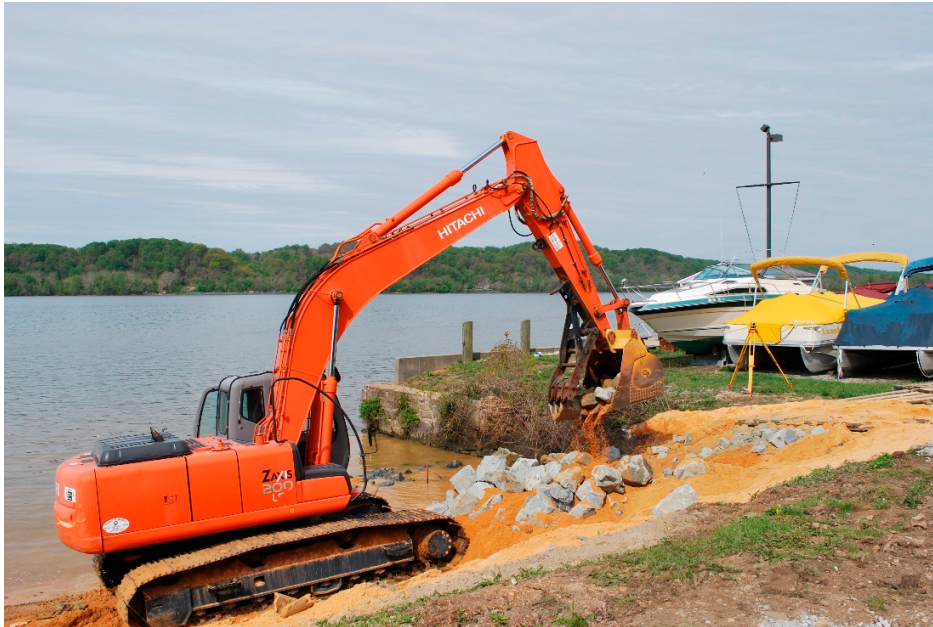

Figure S2. Reconstruction of Map Turtle nesting beach as a Living Shoreline.

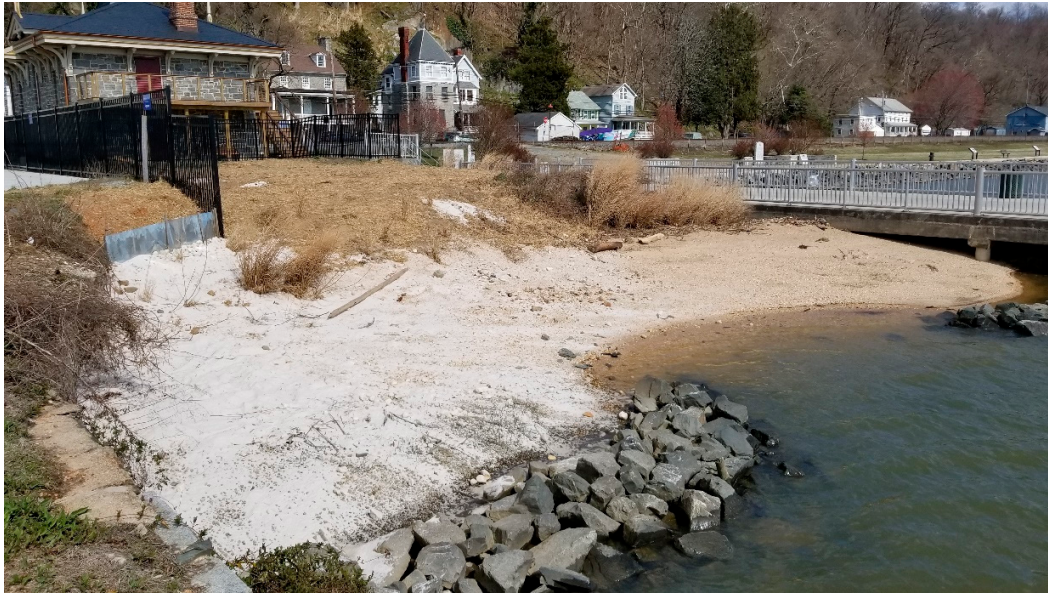

Figure S3. Map Turtle nesting beach following reconstruction

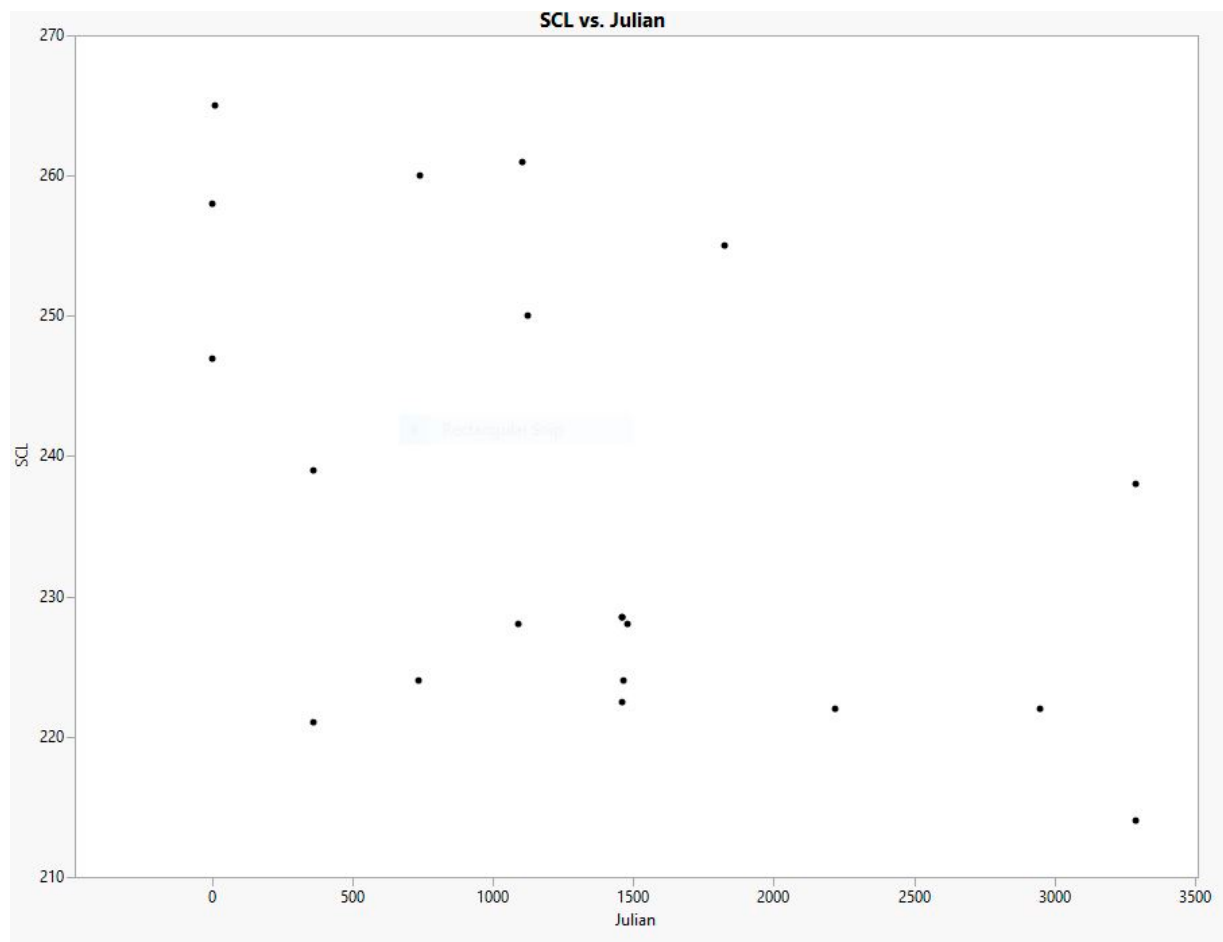

Figure S4. Correlation of date of study versus body size of nesting females
